# Supplementary material
Source: PubMed Central journal article supplement (PMC5016190)
Supplement: 10.1074_M116.718478_jbc.M116.718478-2.pdf [file 10.1074_M116.718478_jbc.M116.718478-2.pdf]

Supplementary Data for:

Evidence that G-quadruplex DNA Accumulates in the Cytoplasm and Participates in Stress Granule Assembly in Response to Oxidative Stress

**Alicia K. Byrd<sup>‡</sup>, Boris L. Zybaylov<sup>‡§</sup>, Leena Maddukuri<sup>‡</sup>, Jun Gao<sup>‡</sup>, John C. Marecki<sup>‡</sup>, Mihir Jaiswal<sup>§</sup>, Matthew R. Bell<sup>‡</sup>, Wezley C. Griffin<sup>‡</sup>, Megan R. Reed<sup>‡</sup>, Shubeena Chib<sup>‡</sup>, Samuel G. Mackintosh<sup>‡¶</sup>, Angus M. MacNicol<sup>¶</sup>, Giulia Baldini<sup>‡</sup>, Robert L. Eoff<sup>‡¶</sup>, and Kevin D. Raney<sup>‡¶</sup>**

From the Departments of <sup>‡</sup>Biochemistry and Molecular Biology and <sup>¶</sup>Neurobiology and Developmental Sciences, University of Arkansas for Medical Sciences, <sup>¶</sup>Winthrop P. Rockefeller Cancer Institute, Little Rock, Arkansas 72205, and the <sup>§</sup>UALR/UAMS Joint Graduate Program in Bioinformatics, University of Arkansas at Little Rock, Little Rock, Arkansas 72204

# Supplementary Figure S1

## A DHX36 sequence coverage, 1 to 320, melanoma pull-down

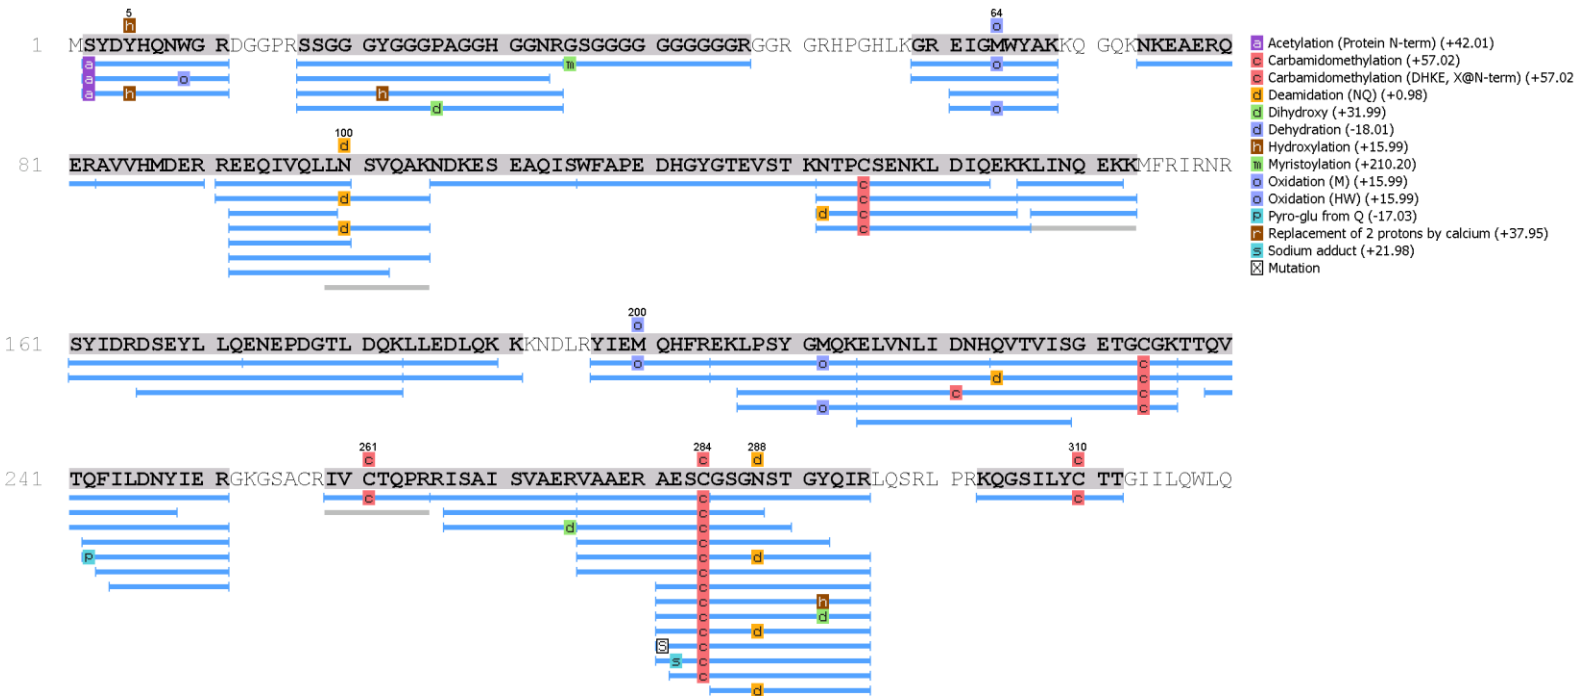

## B DHX36 sequence coverage, 321 to 1008, melanoma pull-down

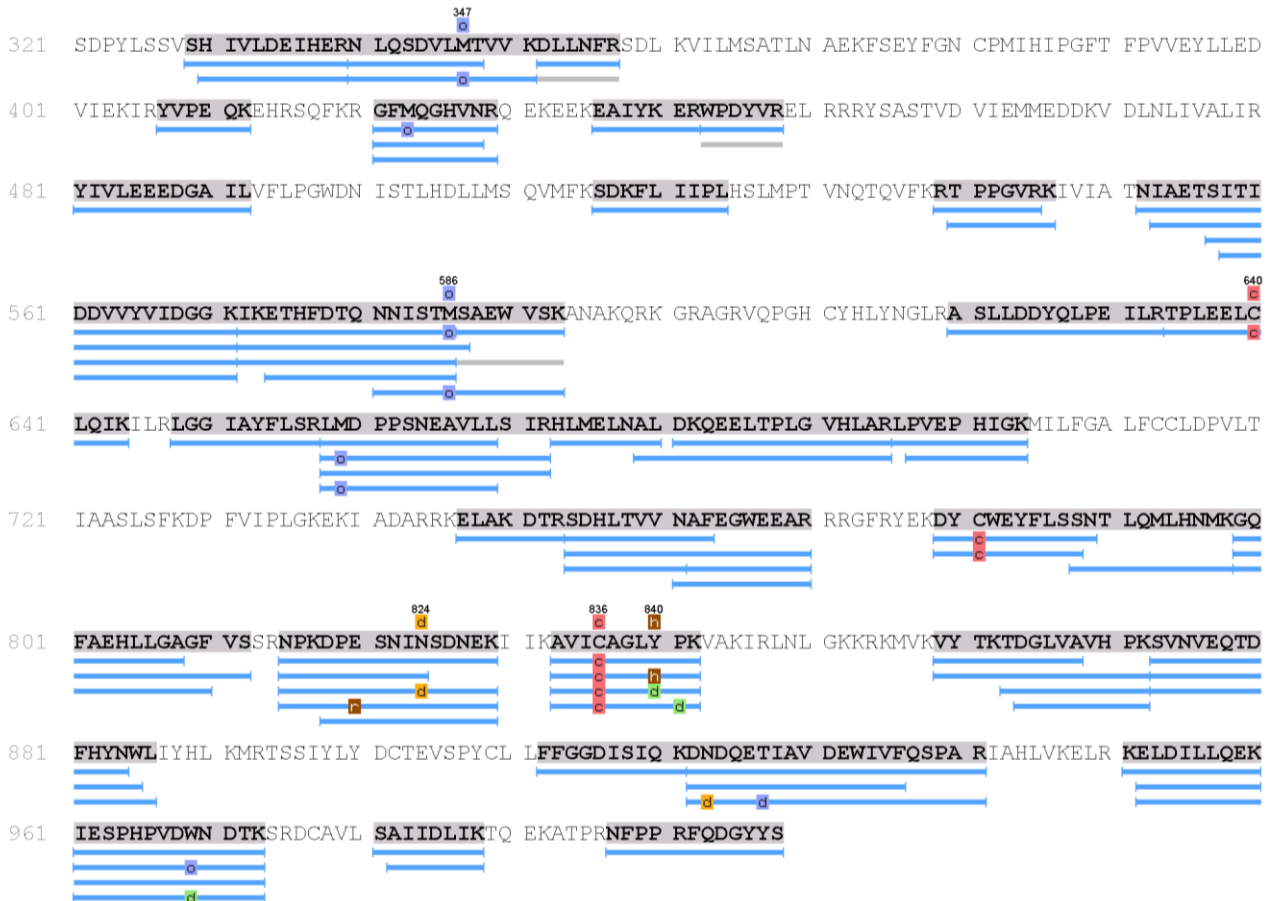

# Supplementary Figure S1

## C DHX36, MS/MS spectra of top 4 scoring peptides, melanoma pull-down

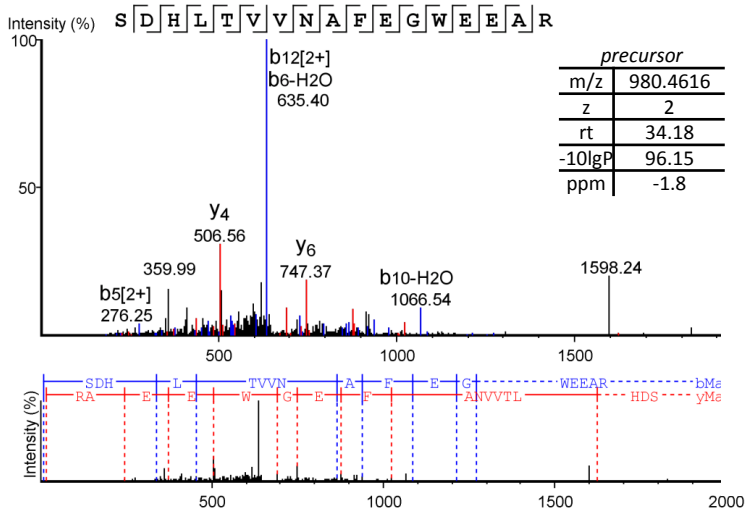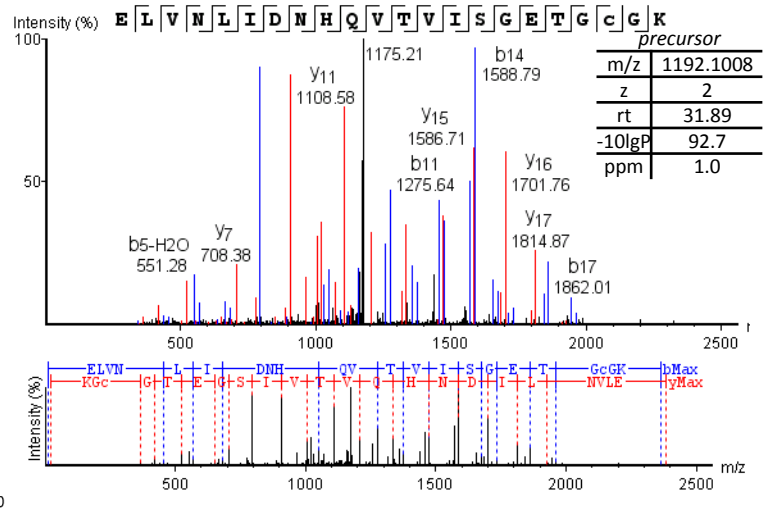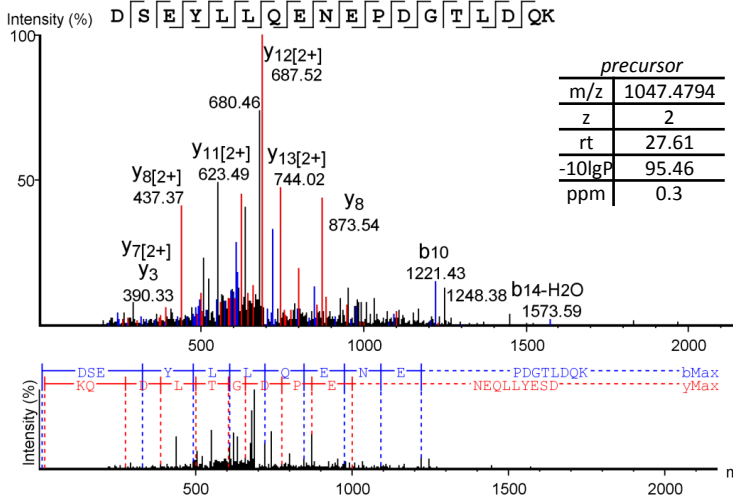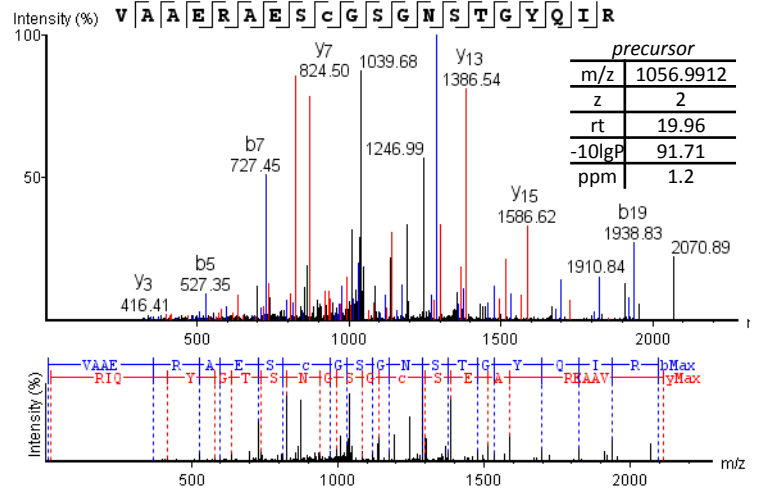

## D ELAV1 sequence coverage, melanoma pull-down

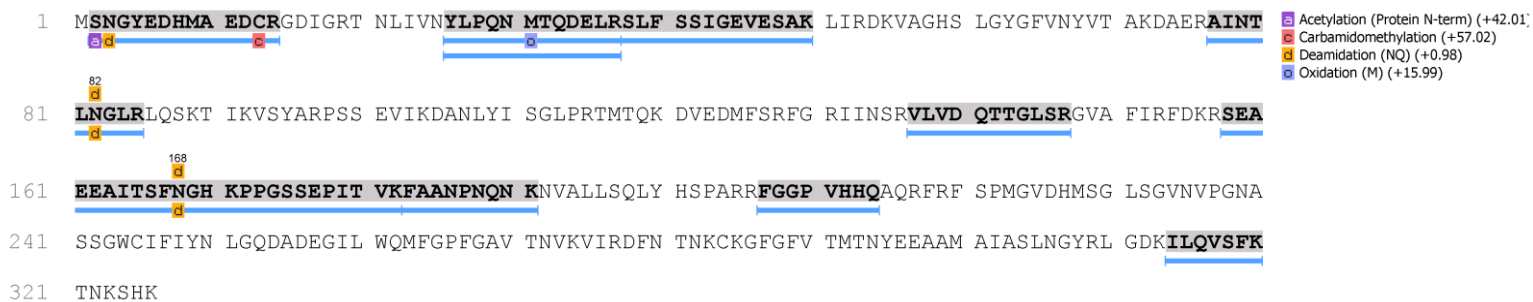

# E ELAV1, MS/MS spectra of top 4 scoring peptides, melanoma pull-down

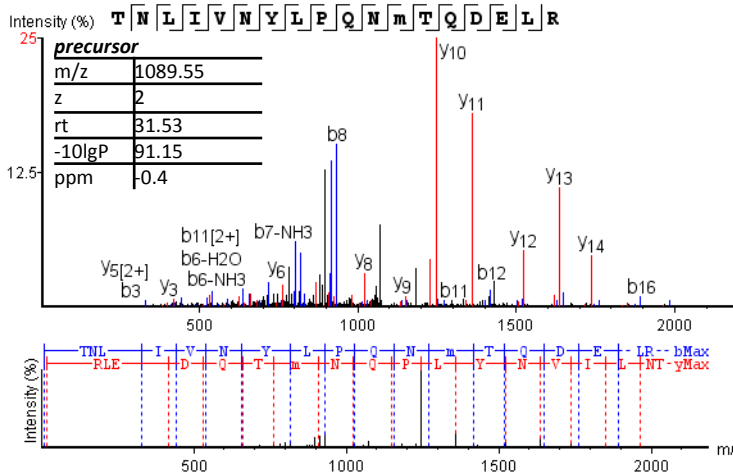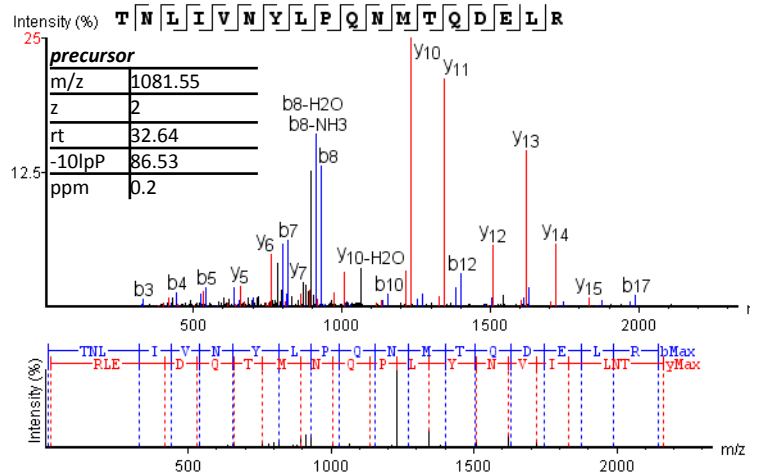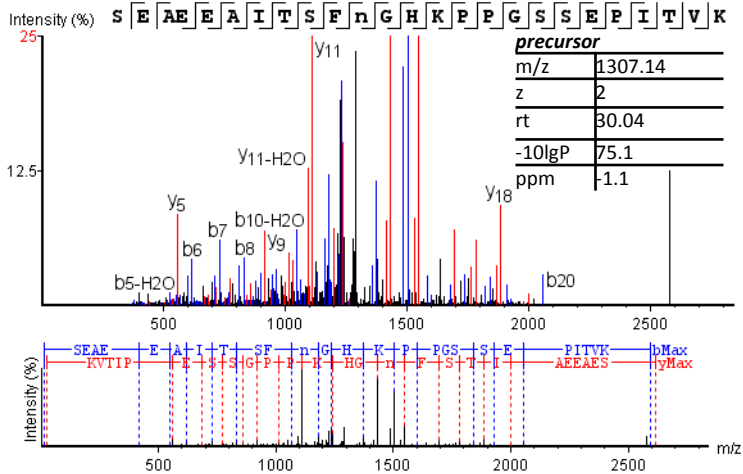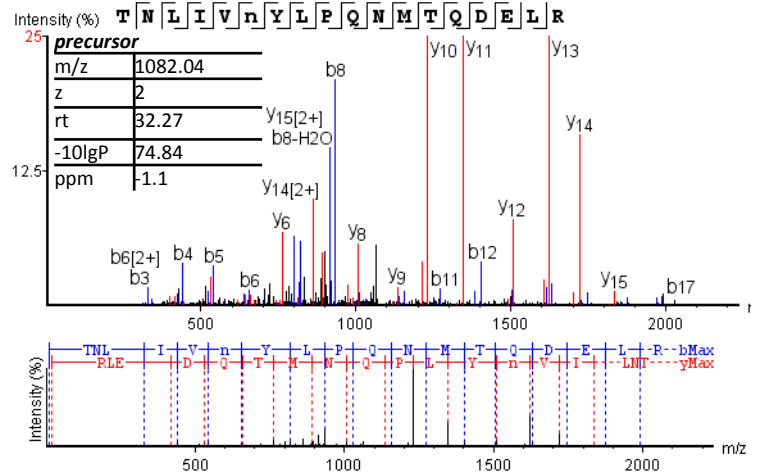

# Supplementary Figure S1

## F TIA-1 sequence coverage, melanoma pull-down

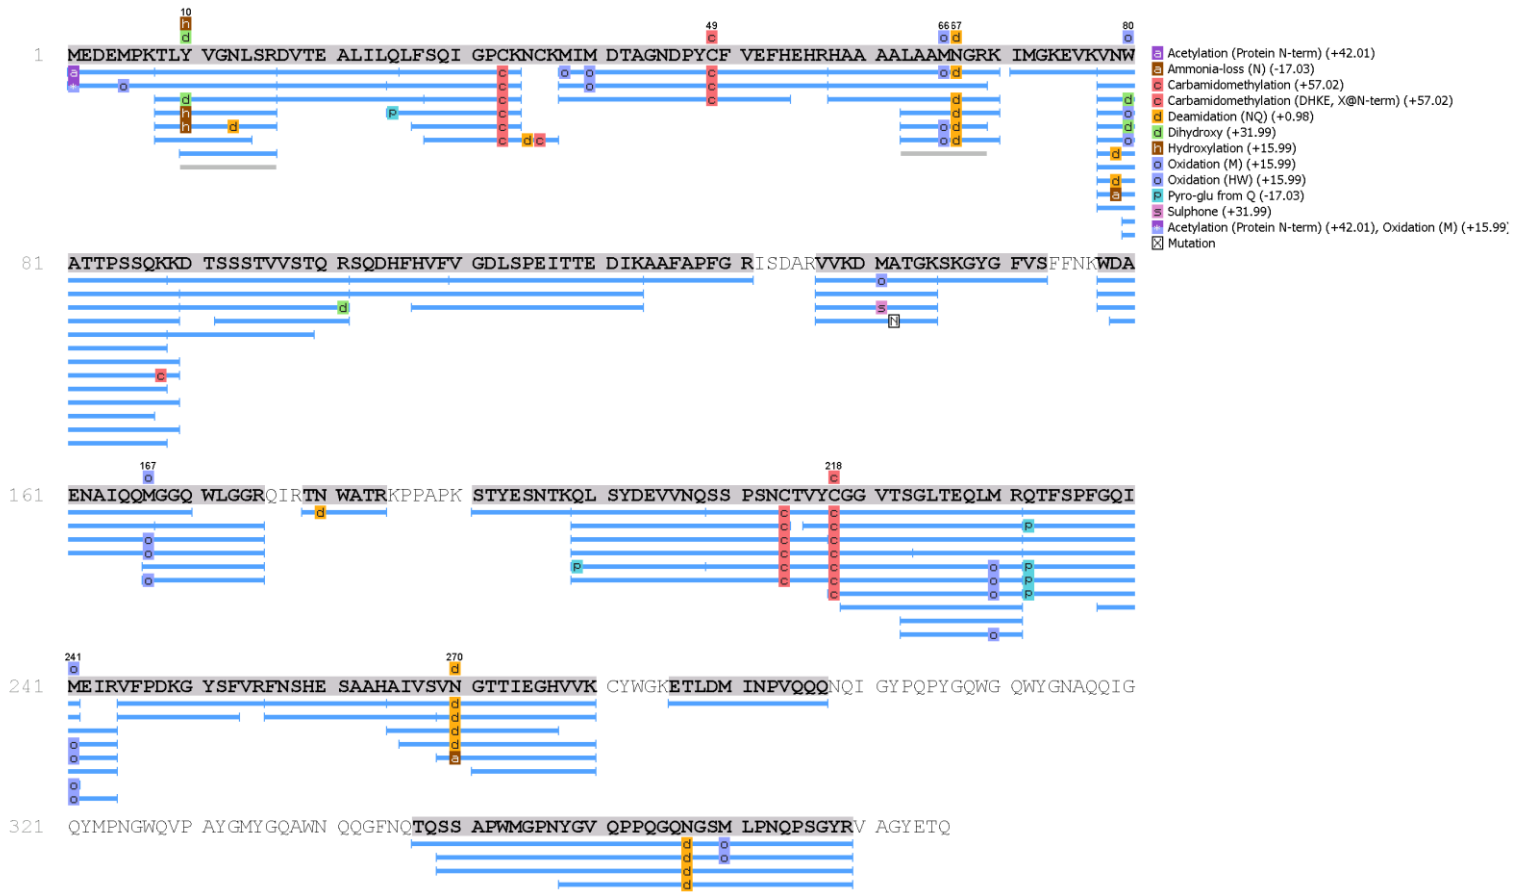

# Supplementary Figure S1

## G TIA-1, MS/MS spectra of top 4 scoring peptides, melanoma pull-down

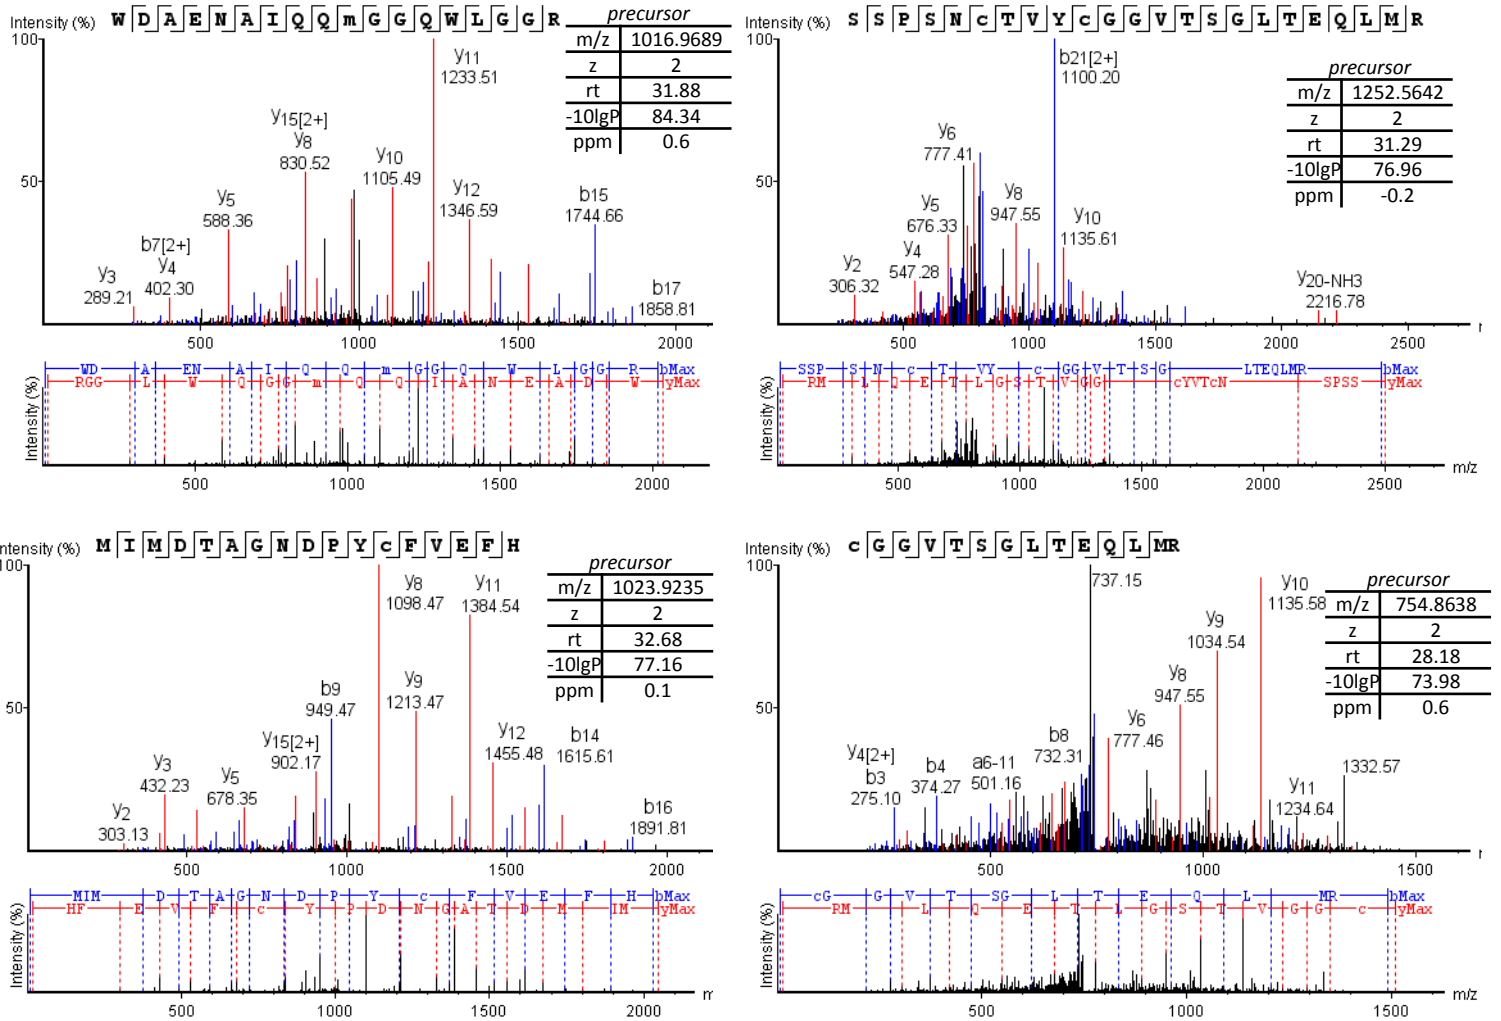

# Supplementary Figure S1

## H YB1 sequence coverage, melanoma pull-down

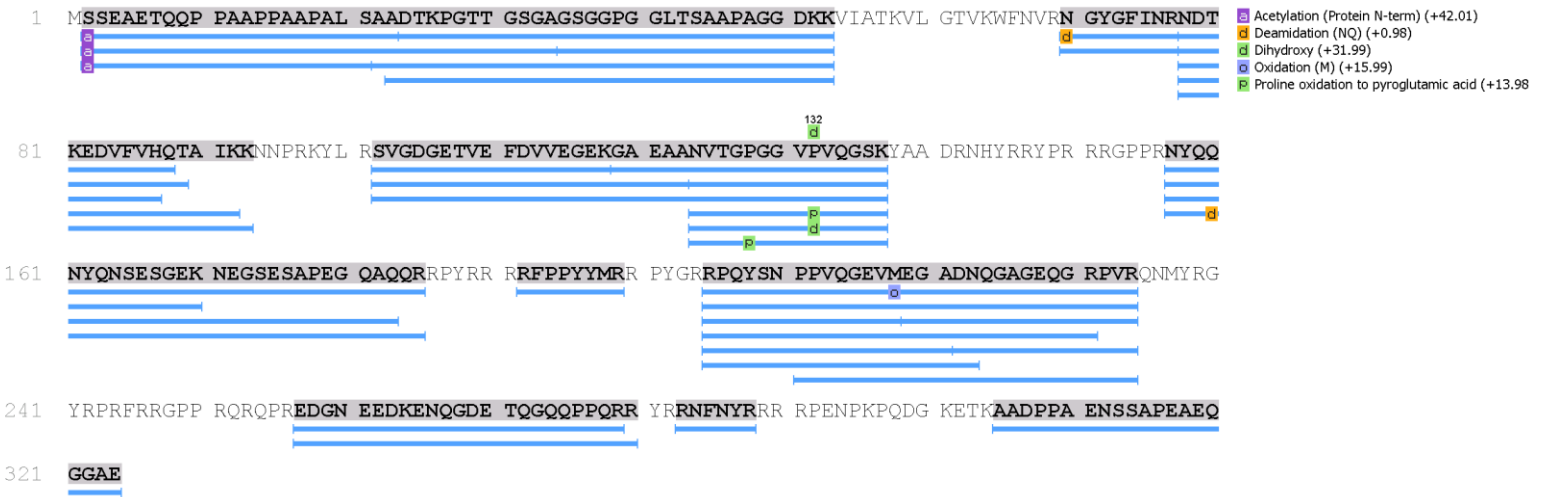



# Supplementary Figure S1

## I YB1, MS/MS spectra of top 4 scoring peptides, melanoma pull-down

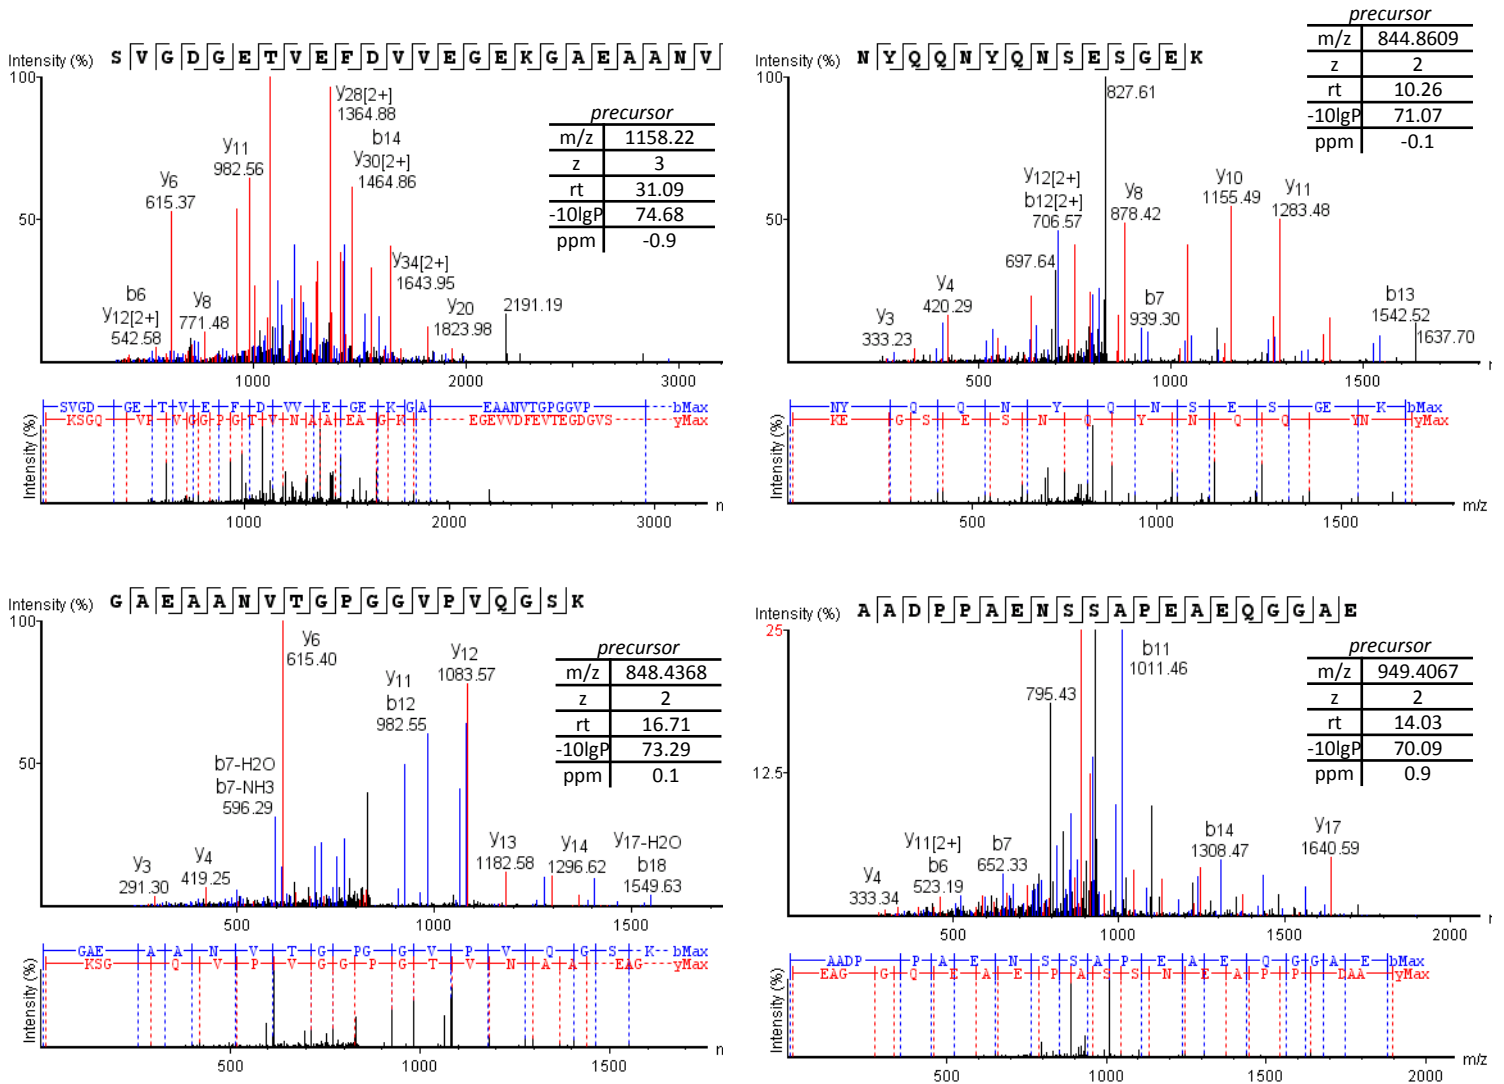

**Supplementary Figure S1.** Sequence coverage and top-scoring spectra of identified G4DNA-bound proteins. (A,B) DHX36 sequence coverage. (C) four MS/MS spectra of the top-ranked DHX36 peptides. (D) ELAV1 sequence coverage. (E) four MS/MS spectra of the top-ranked ELAV1 peptides. (F) TIA-1 sequence coverage. (G) four MS/MS spectra of the top-ranked TIA-1 peptides. (H) YB1 sequence coverage. (I) four MS/MS spectra of the top-ranked YB1 peptides.
